# Supplementary material for: Delayed Rifampin Administration in the Antibiotic Treatment of Periprosthetic Joint Infections Significantly Reduces the Emergence of Rifampin Resistance
Source: MDPI journal article supplement (doi:10.3390/antibiotics10091139), 2021-09-21
Supplement: s1 [file s1]

## Supplementary Materials

**Table S1.** Number of patients per group receiving each antibiotic partner according to route of administration.

|                           | Group 1 | Group 2 |
|---------------------------|---------|---------|
| <b><u>Intravenous</u></b> |         |         |
| Vancomycin                | 15      | 28      |
| Flucloxacillin            | 9       | 8       |
| Clindamycin               | 7       | 3       |
| Ceftriaxon                | 4       | 6       |
| Sultamicillin             | 2       | 4       |
| Ampicillin                | 2       | 0       |
| Meropenem                 | 2       | 7       |
| Fucidic acid              | 2       | 2       |
| Penicillin                | 1       | 1       |
| Cefuroxim                 | 1       | 0       |
| Ciprofloxacin             | 1       | 1       |
| Levofloxacin              | 1       | 1       |
| Fosfomycin                | 1       | 1       |
| Amoxicillin               | 1       | 0       |
| Piperacillin/Tazobactam   | 1       | 0       |
| Teicoplanin               | 0       | 4       |
| Daptomycin                | 0       | 5       |
| Cephazolin                | 0       | 1       |
| Cefotaxim                 | 0       | 1       |
| Ceftazidim                | 0       | 1       |
| <b><u>Oral</u></b>        |         |         |
| Linezolid                 | 13      | 28      |
| Clindamycin               | 6       | 4       |
| Amoxicillin/Clavulanate   | 5       | 0       |
| Penicillin                | 3       | 0       |
| Cefuroxim                 | 2       | 2       |
| Fucidic acid              | 2       | 2       |
| Fosfomycin                | 1       | 1       |
| Cefotaxim                 | 1       | 0       |
| Ciprofloxacin             | 0       | 5       |
| Doxycyclin                | 0       | 1       |
| Flucloxacillin            | 0       | 4       |

**Table S2.** Number of patients per group and per detected pathogens.

|                                    | Group 1 | Rifampin MIC (µg/ml) | Group 2 | Rifampin MIC (µg/ml) |
|------------------------------------|---------|----------------------|---------|----------------------|
| <i>Staphylococcus epidermidis</i>  | 10      | ≤ 0.5                | 19      | ≤ 0.5                |
| <i>Enterococcus faecalis</i>       | 6       | ≤ 0.5                | 7       | ≤ 0.5                |
| <i>Staphylococcus aureus</i>       | 6       | ≤ 0.5                | 9       | ≤ 0.5                |
| <i>Staphylococcus haemolyticus</i> | 5       | ≤ 0.5                | 7       | ≤ 0.5                |
| <i>Staphylococcus capitis</i>      | 3       | ≤ 0.5                | 4       | ≤ 0.5                |
| <i>Enterococcus faecium</i>        | 3       | ≤ 0.5                | 1       | ≤ 0.5                |
| <i>Staphylococcus hominis</i>      | 2       | ≤ 0.5                | 2       | ≤ 0.5                |
| <i>Pseudomonas aeruginosa</i>      | 2       | x                    | 1       | x                    |
| <i>Proteus mirabilis</i>           | 2       | x                    | 2       | x                    |
| <i>Staphylococcus pettenkoferi</i> | 1       | ≤ 0.5                | 1       | ≤ 0.5                |
| <i>Klebsiella aerogenes</i>        | 1       | x                    | 0       | x                    |
| <i>Klebsiella pneumoniae</i>       | 1       | x                    | 5       | x                    |
| <i>Escherichia coli</i>            | 1       | x                    | 2       | x                    |
| <i>Staphylococcus lugdunensis</i>  | 1       | ≤ 0.5                | 0       | x                    |
| <i>Streptococcus dysgalactiae</i>  | 1       | x                    | 0       | x                    |
| <i>Moraxella bovis</i>             | 1       | ≤ 0.5                | 0       | x                    |
| <i>Staphylococcus cohnii</i>       | 1       | ≤ 0.5                | 1       | ≤ 0.5                |
| <i>Cutibacterium acnes</i>         | 1       | ≤ 0.5                | 1       | ≤ 0.5                |
| <i>Enterobacter cloacae</i>        | 0       | x                    | 3       | x                    |
| <i>Acinetobacter lwoffii</i>       | 0       | x                    | 1       | x                    |
| <i>Streptococcus agalactiae</i>    | 0       | x                    | 1       | x                    |
| <b><u>Rifampin resistant</u></b>   |         |                      |         |                      |
| <i>Staphylococcus epidermidis</i>  | 10      | ≥ 32                 | 31      | ≥ 32                 |
| <i>Staphylococcus epidermidis</i>  | 1       | ≥ 16                 | 3       | ≥ 16                 |
| <i>Staphylococcus haemolyticus</i> | 2       | ≥ 32                 | 2       | ≥ 32                 |
| <i>Staphylococcus hominis</i>      | 1       | 8                    | 1       | 2                    |
| <i>Staphylococcus capitis</i>      | 0       | x                    | 1       | ≥ 32                 |

\* MIC Minimum Inhibitory Concentration
